# Supplementary material for: Resveratrol potentiates the in vitro and in vivo anti-tumoral effects of curcumin in head and neck carcinomas
Source: PubMed Central journal article supplement (PMC4279407; doi:10.18632/oncotarget.2534), 2014-09-26
Supplement: oncotarget-05-10745-s001.pdf [file oncotarget-05-10745-s001.pdf]

## Resveratrol potentiates the *in vitro* and *in vivo* anti-tumoral effects of curcumin in head and neck carcinomas

### Supplementary Material

Supplementary Table 1: Effect of water in BALB/c mice: complete blood count (CBC) and clinical chemistry parameters.

| CBC                         | Reference values | Mean $\pm$ SD pre-treatment | Mean $\pm$ SD 4 weeks post- injection |
|-----------------------------|------------------|-----------------------------|---------------------------------------|
| RBC ( $10^6/\text{mm}^3$ )  | 6.0-12.0         | 10.9 $\pm$ 0.5              | 11.2 $\pm$ 1.1                        |
| MCV ( $\mu\text{m}^3$ )     | 43.0-58.0        | 45.8 $\pm$ 0.6              | 46 $\pm$ 0.5                          |
| HCT (%)                     | 35.0-60.0        | 50.1 $\pm$ 1.9              | 51.7 $\pm$ 4.7                        |
| PLT ( $10^3/\text{mm}^3$ )  | 250-1200         | 956.3 $\pm$ 57.7            | 1106.7 $\pm$ 187.6                    |
| MPV ( $\mu\text{m}^3$ )     | 4.0-7.0          | 6 $\pm$ 0.3                 | 5.8 $\pm$ 0.1                         |
| WBC ( $10^3/\text{mm}^3$ )  | 5.0-12.0         | 9.4 $\pm$ 0.3               | 22.1 $\pm$ 2.9                        |
| HGB (g/dl)                  | 9.0-19.0         | 16 $\pm$ 0.7                | 15.8 $\pm$ 1.6                        |
| MCH (Pg)                    | 15.0-19.0        | 14.7 $\pm$ 0.1              | 14.1 $\pm$ 1.1                        |
| MCHC (g/dl)                 | 34.0-39.0        | 32 $\pm$ 0.4                | 30.6 $\pm$ 2.1                        |
| RDW (%)                     | 0-99.9           | 14.8 $\pm$ 0.4              | 16.5 $\pm$ 1                          |
| LYM (%)                     | 50.0-75.0        | 54.5 $\pm$ 7                | 11.8 $\pm$ 5.8                        |
| MID (%)                     | 5.0-15.0         | 7.8 $\pm$ 1.6               | 5.7 $\pm$ 0.6                         |
| GRAN (%)                    | 15.0-40.0        | 37.8 $\pm$ 7.2              | 84.2 $\pm$ 8.7                        |
| LYM ( $10^3/\text{mm}^3$ )  | 4.0-10.0         | 5.2 $\pm$ 0.9               | 2.3 $\pm$ 1.9                         |
| MID ( $10^3/\text{mm}^3$ )  | 0-2.0            | 0.7 $\pm$ 0.2               | 0.9 $\pm$ 0.7                         |
| GRAN ( $10^3/\text{mm}^3$ ) | 0.5-6.0          | 3.5 $\pm$ 0.6               | 18.3 $\pm$ 2.5                        |
| PCT (%)                     | 0-99.9           | 0.6 $\pm$ 0                 | 0.6 $\pm$ 0.1                         |
| PDW (%)                     | 0-99.9           | 9 $\pm$ 0.5                 | 8.6 $\pm$ 0.2                         |
| <b>Clinical Chemistry</b>   |                  |                             |                                       |
| CHOL (mg/dl)                | 50-120           | 118 $\pm$ 46.5              | 133 $\pm$ 17.1                        |
| TRI (mg/dl)                 | 80-200           | 158 $\pm$ 79.5              | 205 $\pm$ 6.2                         |
| GOT (U/l)                   | 20-250           | 125 $\pm$ 102.2             | 146 $\pm$ 93.1                        |
| GPT (U/l)                   | 20-100           | 30.7 $\pm$ 3.8              | 30.2 $\pm$ 0.5                        |
| BUN (mg/dl)                 | 10-40            | 22.7 $\pm$ 4                | 38 $\pm$ 1.7                          |
| LDH (U/l)                   | 300-900          | 897 $\pm$ 315,2             | 2283.3 $\pm$ 367.4                    |

Abbreviations: SD: Standard Deviation; RBC: Red Blood Cells; MCV: Mean Corpuscular Volume; HCT: Hematocrit; PLT: Platelets; MPV: Mean Platelet Volume; WBC: White Blood Cells; HGB: Hemoglobin; MCH: Mean Corpuscular Hemoglobin; MCHC: Mean Corpuscular Hemoglobin Concentration; RDW: Red Cell Distribution Width; LYM: Lymphocytes; MID: Minimum Inhibitory Dilution; GRAN: Granulocytes; PCT: Plateletcrit; PDW: Platelet Distribution Width; CHOL: cholesterol; TRI: triglycerides; GOT: serum Glutamic Oxaloacetic Transaminase; GPT: serum Glutamic Pyruvic Transaminase; BUN: Blood Urea Nitrogen; LDH: Lactate Dehydrogenase.

**Supplementary Table 2: Effect of corn oil in BALB/c mice: complete blood count (CBC) and clinical chemistry parameters.**

| <b>CBC</b>                  | <b>Reference values</b> | <b>Mean <math>\pm</math> SD pre-treatment</b> | <b>Mean <math>\pm</math> SD 4 weeks post- injection</b> |
|-----------------------------|-------------------------|-----------------------------------------------|---------------------------------------------------------|
| RBC ( $10^6/\text{mm}^3$ )  | 6.0-12.0                | 10.8 $\pm$ 1.9                                | 9.9 $\pm$ 1.1                                           |
| MCV ( $\mu\text{m}^3$ )     | 43.0-58.0               | 49.8 $\pm$ 1.2                                | 51.1 $\pm$ 0.6                                          |
| HCT (%)                     | 35.0-60.0               | 51.7 $\pm$ 7.7                                | 51.0 $\pm$ 5.2                                          |
| PLT ( $10^3/\text{mm}^3$ )  | 250-1200                | 521.3 $\pm$ 207.5                             | 605 $\pm$ 312.8                                         |
| MPV ( $\mu\text{m}^3$ )     | 4.0-7.0                 | 6.5 $\pm$ 0.5                                 | 6.4 $\pm$ 0.3                                           |
| WBC ( $10^3/\text{mm}^3$ )  | 5.0-12.0                | 10.1 $\pm$ 1.6                                | 28.6 $\pm$ 8.9                                          |
| HGB (g/dl)                  | 9.0-19.0                | 16.4 $\pm$ 0.6                                | 14.6 $\pm$ 1.9                                          |
| MCH (Pg)                    | 15.0-19.0               | 12.9 $\pm$ 0.4                                | 14.6 $\pm$ 0.3                                          |
| MCHC (g/dl)                 | 34.0-39.0               | 26.5 $\pm$ 1.2                                | 28.6 $\pm$ 1                                            |
| RDW (%)                     | 0-99.9                  | 24.3 $\pm$ 0.8                                | 16.2 $\pm$ 0.8                                          |
| LYM (%)                     | 50.0-75.0               | 61.1 $\pm$ 5.6                                | 26.6 $\pm$ 7.5                                          |
| MID (%)                     | 5.0-15.0                | 10.2 $\pm$ 1.3                                | 11.9 $\pm$ 5.2                                          |
| GRAN (%)                    | 15.0-40.0               | 23.0 $\pm$ 4.4                                | 61.5 $\pm$ 12.4                                         |
| LYM ( $10^3/\text{mm}^3$ )  | 4.0-10.0                | 5.7 $\pm$ 1.5                                 | 7.3 $\pm$ 4                                             |
| MID ( $10^3/\text{mm}^3$ )  | 0-2.0                   | 1 $\pm$ 0.3                                   | 3.2 $\pm$ 2.8                                           |
| GRAN ( $10^3/\text{mm}^3$ ) | 0.5-6.0                 | 2.2 $\pm$ 0.8                                 | 18.1 $\pm$ 4.1                                          |
| PCT (%)                     | 0-99.9                  | 0.7 $\pm$ 0.3                                 | 0.4 $\pm$ 0.2                                           |
| PDW (%)                     | 0-99.9                  | 9.8 $\pm$ 1                                   | 9.6 $\pm$ 0.4                                           |
| <b>Clinical Chemistry</b>   |                         |                                               |                                                         |
| CHOL (mg/dl)                | 50-120                  | 162 $\pm$ 7                                   | 173.3 $\pm$ 14                                          |
| TRI (mg/dl)                 | 80-200                  | 88.3 $\pm$ 6.7                                | 100 $\pm$ 4                                             |
| GOT (U/l)                   | 20-250                  | 146 $\pm$ 76.9                                | 180 $\pm$ 111.1                                         |
| GPT (U/l)                   | 20-100                  | 27.3 $\pm$ 7                                  | 24.9 $\pm$ 0.9                                          |
| BUN (mg/dl)                 | 10-40                   | 32 $\pm$ 2                                    | 54.7 $\pm$ 4.6                                          |
| LDH (U/l)                   | 300-900                 | 768.7 $\pm$ 165.2                             | 3872.0 $\pm$ 1155.5                                     |

Abbreviations: SD: Standard Deviation; RBC: Red Blood Cells; MCV: Mean Corpuscular Volume; HCT: Hematocrit; PLT: Platelets; MPV: Mean Platelet Volume; WBC: White Blood Cells; HGB: Hemoglobin; MCH: Mean Corpuscular Hemoglobin; MCHC: Mean Corpuscular Hemoglobin Concentration; RDW: Red Cell Distribution Width; LYM: Lymphocytes; MID: Minimum Inhibitory Dilution; GRAN: Granulocytes; PCT: Plateletcrit; PDW: Platelet Distribution Width; CHOL: cholesterol; TRI: triglycerides; GOT: serum Glutamic Oxaloacetic Transaminase; GPT: serum Glutamic Pyruvic Transaminase; BUN: Blood Urea Nitrogen; LDH: Lactate Dehydrogenase.

**Supplementary Table 3: Lack of side effects of RES in BALB/c mice: complete blood count (CBC) and clinical chemistry parameters.**

| <b>CBC</b>                  | <b>Reference values</b> | <b>Mean <math>\pm</math> SD pre-treatment</b> | <b>Mean <math>\pm</math> SD 4 weeks post- injection</b> |
|-----------------------------|-------------------------|-----------------------------------------------|---------------------------------------------------------|
| RBC ( $10^6/\text{mm}^3$ )  | 6.0-12.0                | 9.8 $\pm$ 1                                   | 11.3 $\pm$ 1.1                                          |
| MCV ( $\mu\text{m}^3$ )     | 43.0-58.0               | 49.6 $\pm$ 1.1                                | 51.8 $\pm$ 0.9                                          |
| HCT (%)                     | 35.0-60.0               | 53.2 $\pm$ 5.9                                | 58.3 $\pm$ 4.7                                          |
| PLT ( $10^3/\text{mm}^3$ )  | 250-1200                | 733.3 $\pm$ 76.4                              | 1023.7 $\pm$ 190.5                                      |
| MPV ( $\mu\text{m}^3$ )     | 4.0-7.0                 | 6.5 $\pm$ 0.5                                 | 6.9 $\pm$ 0.4                                           |
| WBC ( $10^3/\text{mm}^3$ )  | 5.0-12.0                | 9.9 $\pm$ 1.3                                 | 42.2 $\pm$ 11.8                                         |
| HGB (g/dl)                  | 9.0-19.0                | 15.8 $\pm$ 0.8                                | 16.7 $\pm$ 1.6                                          |
| MCH (Pg)                    | 15.0-19.0               | 13.3 $\pm$ 0.6                                | 14.7 $\pm$ 0.3                                          |
| MCHC (g/dl)                 | 34.0-39.0               | 26.7 $\pm$ 1.9                                | 28.5 $\pm$ 1                                            |
| RDW (%)                     | 0-99.9                  | 19.8 $\pm$ 4.3                                | 16.6 $\pm$ 0.4                                          |
| LYM (%)                     | 50.0-75.0               | 52.5 $\pm$ 2.5                                | 17.8 $\pm$ 7.3                                          |
| MID (%)                     | 5.0-15.0                | 9.5 $\pm$ 1.3                                 | 8.1 $\pm$ 0.9                                           |
| GRAN (%)                    | 15.0-40.0               | 25.8 $\pm$ 5.1                                | 74.2 $\pm$ 8.1                                          |
| LYM ( $10^3/\text{mm}^3$ )  | 4.0-10.0                | 5.3 $\pm$ 0.6                                 | 5.7 $\pm$ 1.6                                           |
| MID ( $10^3/\text{mm}^3$ )  | 0-2.0                   | 1 $\pm$ 0.3                                   | 2.8 $\pm$ 1.7                                           |
| GRAN ( $10^3/\text{mm}^3$ ) | 0.5-6.0                 | 2.8 $\pm$ 1.9                                 | 33.7 $\pm$ 8.5                                          |
| PCT (%)                     | 0-99.9                  | 0.7 $\pm$ 0.3                                 | 0.7 $\pm$ 0.1                                           |
| PDW (%)                     | 0-99.9                  | 10 $\pm$ 0                                    | 10.5 $\pm$ 0.7                                          |
| <b>Clinical Chemistry</b>   |                         |                                               |                                                         |
| CHOL (mg/dl)                | 50-120                  | 150 $\pm$ 8.7                                 | 157.3 $\pm$ 10.1                                        |
| TRI (mg/dl)                 | 80-200                  | 88.7 $\pm$ 5.5                                | 128 $\pm$ 38.2                                          |
| GOT (U/l)                   | 20-250                  | 77.7 $\pm$ 11.2                               | 104 $\pm$ 42.3                                          |
| GPT (U/l)                   | 20-100                  | 31.0 $\pm$ 3.6                                | 34.2 $\pm$ 4                                            |
| BUN (mg/dl)                 | 10-40                   | 31.7 $\pm$ 3.5                                | 45.3 $\pm$ 4.6                                          |
| LDH (U/l)                   | 300-900                 | 751.7 $\pm$ 47.5                              | 3046.7 $\pm$ 732.5                                      |

Abbreviations: SD: Standard Deviation; RBC: Red Blood Cells; MCV: Mean Corpuscular Volume; HCT: Hematocrit; PLT: Platelets; MPV: Mean Platelet Volume; WBC: White Blood Cells; HGB: Hemoglobin; MCH: Mean Corpuscular Hemoglobin; MCHC: Mean Corpuscular Hemoglobin Concentration; RDW: Red Cell Distribution Width; LYM: Lymphocytes; MID: Minimum Inhibitory Dilution; GRAN: Granulocytes; PCT: Plateletcrit; PDW: Platelet Distribution Width; CHOL: cholesterol; TRI: triglycerides; GOT: serum Glutamic Oxaloacetic Transaminase; GPT: serum Glutamic Pyruvic Transaminase; BUN: Blood Urea Nitrogen; LDH: Lactate Dehydrogenase.

**Supplementary Table 4: Lack of side effects of CUR in BALB/c mice: complete blood count (CBC) and clinical chemistry parameters.**

| <b>CBC</b>                  | <b>Reference values</b> | <b>Mean <math>\pm</math> SD pre-treatment</b> | <b>Mean <math>\pm</math> SD 4 weeks post- injection</b> | <b>Mean <math>\pm</math> SD 8 weeks post- injection</b> |
|-----------------------------|-------------------------|-----------------------------------------------|---------------------------------------------------------|---------------------------------------------------------|
| RBC ( $10^6/\text{mm}^3$ )  | 6.0-12.0                | 10.3 $\pm$ 1.5                                | 11.3 $\pm$ 0.3                                          | 10.6 $\pm$ 0.8                                          |
| MCV ( $\mu\text{m}^3$ )     | 43.0-58.0               | 49.8 $\pm$ 1.6                                | 48.1 $\pm$ 2.7                                          | 45.9 $\pm$ 3.4                                          |
| HCT (%)                     | 35.0-60.0               | 52.2 $\pm$ 6.3                                | 54.4 $\pm$ 4.6                                          | 49 $\pm$ 7                                              |
| PLT ( $10^3/\text{mm}^3$ )  | 250-1200                | 728.3 $\pm$ 84.6                              | 871 $\pm$ 108.9                                         | 966 $\pm$ 109.5                                         |
| MPV ( $\mu\text{m}^3$ )     | 4.0-7.0                 | 6.5 $\pm$ 0.5                                 | 6.3 $\pm$ 0.7                                           | 6 $\pm$ 0.4                                             |
| WBC ( $10^3/\text{mm}^3$ )  | 5.0-12.0                | 10.3 $\pm$ 2                                  | 17.4 $\pm$ 4.3                                          | 19.3 $\pm$ 4.7                                          |
| HGB (g/dl)                  | 9.0-19.0                | 15.8 $\pm$ 0.8                                | 17 $\pm$ 0.4                                            | 15.1 $\pm$ 1.6                                          |
| MCH (Pg)                    | 15.0-19.0               | 13.3 $\pm$ 0.6                                | 15.1 $\pm$ 0.2                                          | 14.2 $\pm$ 0.6                                          |
| MCHC (g/dl)                 | 34.0-39.0               | 26.7 $\pm$ 1.9                                | 31.4 $\pm$ 2                                            | 31 $\pm$ 1.1                                            |
| RDW (%)                     | 0-99.9                  | 23.5 $\pm$ 1.5                                | 16.8 $\pm$ 1.6                                          | 17.2 $\pm$ 0.9                                          |
| LYM (%)                     | 50.0-75.0               | 57 $\pm$ 2.6                                  | 43.7 $\pm$ 4.4                                          | 23.7 $\pm$ 6.9                                          |
| MID (%)                     | 5.0-15.0                | 9.5 $\pm$ 1.3                                 | 5.5 $\pm$ 0.9                                           | 7.3 $\pm$ 1.2                                           |
| GRAN (%)                    | 15.0-40.0               | 25 $\pm$ 5                                    | 50.8 $\pm$ 3.5                                          | 69 $\pm$ 7.9                                            |
| LYM ( $10^3/\text{mm}^3$ )  | 4.0-10.0                | 5.5 $\pm$ 0.5                                 | 8.4 $\pm$ 2.7                                           | 4.3 $\pm$ 0.7                                           |
| MID ( $10^3/\text{mm}^3$ )  | 0-2.0                   | 1.1 $\pm$ 0.4                                 | 1.2 $\pm$ 0.6                                           | 1.4 $\pm$ 0.3                                           |
| GRAN ( $10^3/\text{mm}^3$ ) | 0.5-6.0                 | 2.8 $\pm$ 1.3                                 | 7.9 $\pm$ 6.3                                           | 13.6 $\pm$ 4.5                                          |
| PCT (%)                     | 0-99.9                  | 0.5 $\pm$ 0.5                                 | 0.6 $\pm$ 0.1                                           | 0.6 $\pm$ 0.1                                           |
| PDW (%)                     | 0-99.9                  | 10 $\pm$ 0.5                                  | 9.5 $\pm$ 1.3                                           | 9 $\pm$ 0.7                                             |
| <b>Clinical Chemistry</b>   |                         |                                               |                                                         |                                                         |
| CHOL (mg/dl)                | 50-120                  | 151.7 $\pm$ 12.6                              | 162.7 $\pm$ 28.1                                        | 125.3 $\pm$ 34.9                                        |
| TRI (mg/dl)                 | 80-200                  | 125 $\pm$ 51.1                                | 161.3 $\pm$ 56                                          | 116 $\pm$ 41.3                                          |
| GOT (U/l)                   | 20-250                  | 113.3 $\pm$ 32.1                              | 134.7 $\pm$ 20.1                                        | 112 $\pm$ 87.2                                          |
| GPT (U/l)                   | 20-100                  | 42 $\pm$ 13.1                                 | 49.5 $\pm$ 13.9                                         | 31.1 $\pm$ 16.6                                         |
| BUN (mg/dl)                 | 10-40                   | 32 $\pm$ 2                                    | 46.7 $\pm$ 12.9                                         | 55.3 $\pm$ 17.9                                         |
| LDH (U/l)                   | 300-900                 | 751.7 $\pm$ 147.5                             | 2921.3 $\pm$ 1169.6                                     | 1037.3 $\pm$ 273                                        |

Abbreviations: SD: Standard Deviation; RBC: Red Blood Cells; MCV: Mean Corpuscular Volume; HCT: Hematocrit; PLT: Platelets; MPV: Mean Platelet Volume; WBC: White Blood Cells; HGB: Hemoglobin; MCH: Mean Corpuscular Hemoglobin; MCHC: Mean Corpuscular Hemoglobin Concentration; RDW: Red Cell Distribution Width; LYM: Lymphocytes; MID: Minimum Inhibitory Dilution; GRAN: Granulocytes; PCT: Plateletcrit; PDW: Platelet Distribution Width; CHOL: cholesterol; TRI: triglycerides; GOT: serum Glutamic Oxaloacetic Transaminase; GPT: serum Glutamic Pyruvic Transaminase; BUN: Blood Urea Nitrogen; LDH: Lactate Dehydrogenase.

**Supplementary Table 5: Lack of side effects of RES+CUR in BALB/c mice: complete blood count (CBC) and clinical chemistry parameters.**

| <b>CBC</b>                  | <b>Reference values</b> | <b>Mean <math>\pm</math> SD pre-treatment</b> | <b>Mean <math>\pm</math> SD 4 weeks post- injection</b> | <b>Mean <math>\pm</math> SD 8 weeks post- injection</b> |
|-----------------------------|-------------------------|-----------------------------------------------|---------------------------------------------------------|---------------------------------------------------------|
| RBC ( $10^6/\text{mm}^3$ )  | 6.0-12.0                | 10.5 $\pm$ 1.3                                | 10.6 $\pm$ 0.5                                          | 10.4 $\pm$ 0.7                                          |
| MCV ( $\mu\text{m}^3$ )     | 43.0-58.0               | 51.6 $\pm$ 1.9                                | 53.8 $\pm$ 0.2                                          | 47.6 $\pm$ 2.9                                          |
| HCT (%)                     | 35.0-60.0               | 51.5 $\pm$ 5.7                                | 57.3 $\pm$ 2.9                                          | 49.8 $\pm$ 2.4                                          |
| PLT ( $10^3/\text{mm}^3$ )  | 250-1200                | 734 $\pm$ 75.3                                | 766.3 $\pm$ 99.2                                        | 716.7 $\pm$ 245.4                                       |
| MPV ( $\mu\text{m}^3$ )     | 4.0-7.0                 | 6.3 $\pm$ 0.6                                 | 6.1 $\pm$ 0.3                                           | 6.5 $\pm$ 0.3                                           |
| WBC ( $10^3/\text{mm}^3$ )  | 5.0-12.0                | 12.5 $\pm$ 1.5                                | 13.9 $\pm$ 1                                            | 6.5 $\pm$ 1.3                                           |
| HGB (g/dl)                  | 9.0-19.0                | 16 $\pm$ 0.6                                  | 16.4 $\pm$ 0.9                                          | 14.8 $\pm$ 0.9                                          |
| MCH (Pg)                    | 15.0-19.0               | 14.4 $\pm$ 1.3                                | 15.4 $\pm$ 0.2                                          | 14.2 $\pm$ 1                                            |
| MCHC (g/dl)                 | 34.0-39.0               | 26.5 $\pm$ 1.7                                | 28.6 $\pm$ 0.2                                          | 29.7 $\pm$ 0.6                                          |
| RDW (%)                     | 0-99.9                  | 20.6 $\pm$ 4.2                                | 16.7 $\pm$ 0.8                                          | 16.2 $\pm$ 2.1                                          |
| LYM (%)                     | 50.0-75.0               | 51.9 $\pm$ 6.2                                | 38.3 $\pm$ 5.6                                          | 50.5 $\pm$ 5.6                                          |
| MID (%)                     | 5.0-15.0                | 11.1 $\pm$ 2.6                                | 10.1 $\pm$ 3.2                                          | 11.3 $\pm$ 3.2                                          |
| GRAN (%)                    | 15.0-40.0               | 32.2 $\pm$ 8.5                                | 51.6 $\pm$ 8.8                                          | 38.2 $\pm$ 2.5                                          |
| LYM ( $10^3/\text{mm}^3$ )  | 4.0-10.0                | 5.6 $\pm$ 0.7                                 | 4.4 $\pm$ 1.7                                           | 3.3 $\pm$ 1                                             |
| MID ( $10^3/\text{mm}^3$ )  | 0-2.0                   | 1.4 $\pm$ 0.6                                 | 1.5 $\pm$ 0.4                                           | 0.7 $\pm$ 0.1                                           |
| GRAN ( $10^3/\text{mm}^3$ ) | 0.5-6.0                 | 3.4 $\pm$ 2.2                                 | 8 $\pm$ 2.1                                             | 2.4 $\pm$ 0.3                                           |
| PCT (%)                     | 0-99.9                  | 0.3 $\pm$ 0.3                                 | 0.5 $\pm$ 0.1                                           | 0.5 $\pm$ 0.2                                           |
| PDW (%)                     | 0-99.9                  | 9.2 $\pm$ 0.7                                 | 9.1 $\pm$ 0.4                                           | 9.7 $\pm$ 0.4                                           |
| <b>Clinical Chemistry</b>   |                         |                                               |                                                         |                                                         |
| CHOL (mg/dl)                | 50-120                  | 139.3 $\pm$ 17.9                              | 137.3 $\pm$ 8.3                                         | 159.3 $\pm$ 23.9                                        |
| TRI (mg/dl)                 | 80-200                  | 92 $\pm$ 7.2                                  | 68 $\pm$ 28                                             | 146.7 $\pm$ 70.2                                        |
| GOT (U/l)                   | 20-250                  | 122 $\pm$ 25.5                                | 100 $\pm$ 27.7                                          | 148 $\pm$ 125.8                                         |
| GPT (U/l)                   | 20-100                  | 31.3 $\pm$ 5.8                                | 27 $\pm$ 1.7                                            | 48.8 $\pm$ 26                                           |
| BUN (mg/dl)                 | 10-40                   | 35.7 $\pm$ 4                                  | 44 $\pm$ 4                                              | 53.3 $\pm$ 2.3                                          |
| LDH (U/l)                   | 300-900                 | 996 $\pm$ 451.7                               | 1581.3 $\pm$ 330.1                                      | 910.7 $\pm$ 445.5                                       |

Abbreviations: SD: Standard Deviation; RBC: Red Blood Cells; MCV: Mean Corpuscular Volume; HCT: Hematocrit; PLT: Platelets; MPV: Mean Platelet Volume; WBC: White Blood Cells; HGB: Hemoglobin; MCH: Mean Corpuscular Hemoglobin; MCHC: Mean Corpuscular Hemoglobin Concentration; RDW: Red Cell Distribution Width; LYM: Lymphocytes; MID: Minimum Inhibitory Dilution; GRAN: Granulocytes; PCT: Plateletcrit; PDW: Platelet Distribution Width; CHOL: cholesterol; TRI: triglycerides; GOT: serum Glutamic Oxaloacetic Transaminase; GPT: serum Glutamic Pyruvic Transaminase; BUN: Blood Urea Nitrogen; LDH: Lactate Dehydrogenase.
